# Supplementary material for: Artificial Intelligence-Based Cervical Cancer Screening on Images Taken during Visual Inspection with Acetic Acid: A Systematic Review
Source: MDPI journal article supplement (doi:10.3390/diagnostics13050836), 2023-02-22
Supplement: s1 [file s1]

## Additional File 1.

**Table S1.** Searches and results

| Search engine  | Initial search strategy                                                                                                                                                                                   | Number of articles |
|----------------|-----------------------------------------------------------------------------------------------------------------------------------------------------------------------------------------------------------|--------------------|
| Google Scholar | cervical cancer AND (automatic detection OR machine learning OR deep learning OR artificial intelligence) AND (colposcope OR colposcopist OR colposcopic OR visual assesment OR visual inspection OR VIA) | 1979               |
| PubMed         | cervical cancer AND (machine learning OR deep learning OR artificial intelligence OR automatic detection)                                                                                                 | 482                |
| Scopus         | cervical cancer AND (machine learning OR deep learning OR artificial intelligence OR neural network)                                                                                                      | 533                |
